# Supplementary material for: Targeting plasmid-encoded proteins that contain immunoglobulin-like domains to combat antimicrobial resistance
Source: eLife journal article supplement (doi:10.7554/elife.95328), 2024-05-08

**A**

Supernatant Expi293F pIgΔCH1 VHH-RSP  
Protein A affinity column  
purified VHH-RSP#3-Fc  
Centrificon concentrated  
purified VHH-RSP#3-Fc

50 kDa  
37 kDa

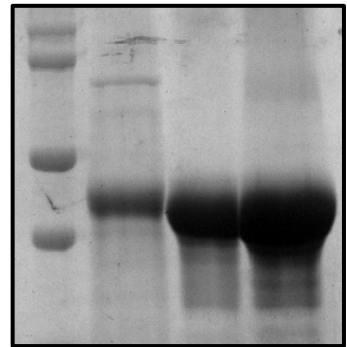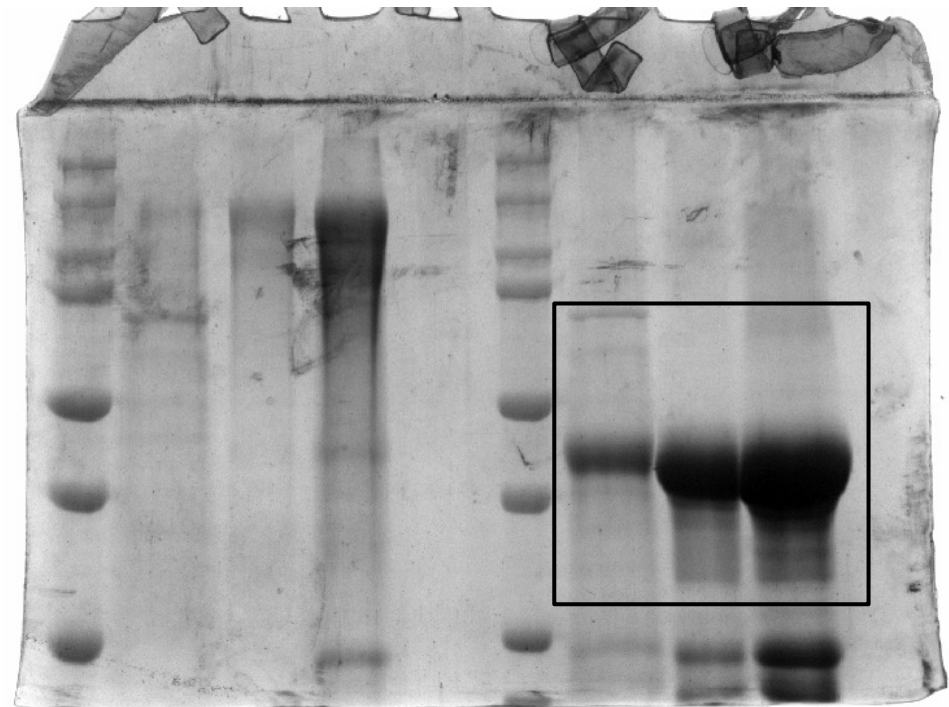

Supplement: fig8-data2 [file elife-95328-fig8-data2-v1.pdf]
