# Supplementary material for: Targeting plasmid-encoded proteins that contain immunoglobulin-like domains to combat antimicrobial resistance
Source: eLife. 2024 Jul 24;13:RP95328. doi: 10.7554/eLife.95328 (PMC11268884; doi:10.7554/eLife.95328)
Supplement: Figure 1—source data 1. [file elife-95328-fig1-data1.xlsx]

## Sheet: Panel A
	dpi	CTL	Sal WT	Sal pHMC1	Sal WT +Amp	Sal pHMC1 +Amp
	6	0
	6	0
	6	0						dpi: days post infection
	6	0
	6	0
	6	0
	5		1
	5		1
	5		1
	6		0
	6		0
	6		0
	6		0
	6		0
	6				0
	6				0
	6				0
	6				0
	6				0
	6				0
	6				0
	6				0
	4			1
	5			1
	6			0
	6			0
	6			0
	6			0
	6			0
	6			0
	4					1
	5					1
	6					0
	6					0
	6					0
	6					0
	6					0
	6					0

## Sheet: Panel B
		days post-infection (dpi)
	Mice	0	1	2	3	4	5	6
Sal WT	SA3235	21.4	18.5	17.6			14.7	-
Sal WT	SA3236	21.8	21.8	22.1			19	-
Sal WT	SA3237	21.3	21.8	20.2			17	16.8
Sal WT	SA3238	22.6	21.6			17.9	16.6	-
Sal WT	SA3239	21.6	22.4			21.3	19.6	18.5
Sal WT	SA3240	22.5	23.4			22	21	20.2
Sal pHMC1	SA3241	20.5	21			20.4	18.9	18
Sal pHMC1	SA3242	21.5	23			21.3	19.3	19
Sal pHMC1	SA3243	21.3	21.6			20	18.3	17.9
Sal WT +Amp	SA3244	21.5	21.3	23.8			22	22.3
Sal WT +Amp	SA3245	22.1	22.3	24.4			22.5	22.6
Sal WT +Amp	SA3246	20.6	20.9	23.2			21.8	22.3
Sal pHMC1 +Amp	SA3247	20.7	21.4			22.7	17.4	16.8
Sal pHMC1 +Amp	SA3248	22.2	22.6			22.1	19.8	19.5
Sal pHMC1 +Amp	SA3249	22.2	22.4			22	18.5	18.2
Sal WT +Amp	SA3252	21.9	22.4			22.2	21.9	22.5
Sal pHMC1 +Amp	SA3253	21.4	20.2	19.1			-	-
Sal pHMC1 +Amp	SA3254	22.1	21	21.5			16.5	15.1
Sal pHMC1 +Amp	SA3255	22	21.1	22.1			17.6	17.2
Sal pHMC1	SA3256	20.3	21.4	22.3			17.5	16.5
Sal pHMC1	SA3257	22.4	23.5	24.1			19.9	19.3
Sal pHMC1	SA3258	21.9	21	20.6			16.4	16
CTL	SA3259	21.4	22.9	22.9			22.9	23.9
CTL	SA3260	22.4	22.5	23.6			23.9	23.3
CTL	SA3261	22.8	22.9			23.6	23.3	23.9
CTL	SA3262	21.2	21.2			21.8	21.6	22.2
Sal WT +Amp	SA3263	21.7			19.5	19.1	19.8	19.8
Sal WT +Amp	SA3264	22			22	21.9	22.2	22.3
Sal WT	SA3265	23.8			23.6	23	22.1	21.2
Sal WT	SA3266	21.3			20.4	18.7	18.3	16.9
Sal pHMC1	SA3267	23.8			23.5	22.8	23.4	23.7
Sal pHMC1	SA3268	22.5			21	19.8	19.5	18.8
Sal pHMC1 +Amp	SA3269	23.5			21.1	19.2	18.3	16.7
Sal pHMC1 +Amp	SA3270	22.6			19	17.3	16.3	-
CTL	SA3271	22.6			22	22.1	22.5	23
CTL	SA3272	23.4			24.4	24.2	24.3	24.5

## Sheet: Panel C
			Eye secretions			Coat aspect			Posture				Behavior (movement)			Gastrointestinal alterations			Body weight loss
			Absent	Present	Evident	Normal	Altered	Bad	Normal	poc	intermitja	Corvat	Normal	poc	inactiu	Absent	alteracio	Hemorragia	0	5-10%	10-20%	>20%
		Mice	0	1	2	0	1	2	0	1	2	3	0	1	2	0	1	2	0	1	2	3	Total
	Sal WT	SA3235
	Sal WT	SA3236
	Sal WT	SA3237	0					2				3			2	0						3	10
	Sal WT	SA3238
	Sal WT	SA3239	0				1			1				1		0					2		5
	Sal WT	SA3240	0				1			1				1		0					2		5
	Sal pHMC1	SA3241	0			0			0				0			0					2		2
	Sal pHMC1	SA3242	0				1			1			0			0					2		4
	Sal pHMC1	SA3243	0				1		0				0			0					2		3
	Sal WT +Amp	SA3244	0			0			0				0			0			0				0
	Sal WT +Amp	SA3245	0			0			0				0			0			0				0
	Sal WT +Amp	SA3246	0			0			0				0			0				1			1
	Sal pHMC1 +Amp	SA3247	0				1				2		0			0					2		5
	Sal pHMC1 +Amp	SA3248	0				1				2		0			0					2		5
	Sal pHMC1 +Amp	SA3249		1				2		1				1		0					2		7
	Sal WT +Amp	SA3252	0			0			0				0			0			0				0
	Sal pHMC1 +Amp	SA3254			2		1					3		1				2				3	12
	Sal pHMC1 +Amp	SA3255			2		1					3			2	0						3	11
	Sal pHMC1	SA3256			2			2				3			2	0					2		11
	Sal pHMC1	SA3257	0					2			2			1		0					2		7
	Sal pHMC1	SA3258	0				1				2				2	0						3	8
	CTL	SA3259	0			0			0				0			0			0				0
	CTL	SA3260	0			0			0				0			0			0				0
	CTL	SA3261	0			0			0				0			0			0				0
	CTL	SA3262	0			0			0				0			0			0				0
	Sal WT +Amp	SA3263	0				1		0				0			0				1			2
	Sal WT +Amp	SA3264	0				1		0				0			0			0				1
	Sal WT	SA3265		1			1		0				0			0				1			3
	Sal WT	SA3266		1			1				2		0			0						3	7
	Sal pHMC1	SA3267	0				1				2			1		0			0				4
	Sal pHMC1	SA3268		1				2			2				2	0					2		9
	Sal pHMC1 +Amp	SA3269			2			2				3			2	0						3	12
	CTL	SA3271	0			0			0				0			0			0				0
	CTL	SA3272	0			0			0				0			0			0				0

## Sheet: Panel D, E & F
	Il-6 expression
	CTL	Sal WT	Sal pHMC1	Sal WT +Amp	Sal pHMC1 +Amp
	1.1	55.8	56	1.8	35.6
	1	65.5	39.8	40.7	75.2
	0.9	36.6	42.9	2	24.6
	0.9	55.8	63.2	1.8	7.2
	1.1	50.2	51.6	20.8	30.7
	1	40.7	47.8	23.7	24.8
			41.7
	Il-1β expression
	CTL	Sal WT	Sal pHMC1	Sal WT +Amp	Sal pHMC1 +Amp
	1.1	19.44	15.79	2.15	10.71
	0.88	18.02	13.8	4.14	18.52
	0.96	16.18	13.8	1.75	8.09
	1.3	16.64	12.43	1.27	3.14
	0.77	17.16	12.14	4.23	9.13
	1	17.98	15.85	2.99	7.55
			14.79
	Tnf-α expression
	CTL	Sal WT	Sal pHMC1	Sal WT +Amp	Sal pHMC1 +Amp
	1.17	8.35	8.44	1.13	5.55
	0.98	9.39	7.09	2.33	6.39
	0.86	5.82	7.19	1.1	4.06
	0.91	7.32	8.76	1.52	6.07
	1.23	8.2	6.48	2.66	4.7
	0.85	7.6	8.8	1.33	5.98
			7
