# Supplementary material for: Targeting plasmid-encoded proteins that contain immunoglobulin-like domains to combat antimicrobial resistance
Source: eLife. 2024 Jul 24;13:RP95328. doi: 10.7554/eLife.95328 (PMC11268884; doi:10.7554/eLife.95328)
Supplement: Figure 2—source data 1. [file elife-95328-fig2-data1.xlsx]

## Sheet: Panel A
		Non-Immunized						Immunized
weeks	3	14.6	14.1	14.8	13.3	12.8	13.8	14.7	13.7	14.3	14.8	13.3	13
	5	19.7	19.9	20.6	17.1	13.1	17.4	19.4	18.9	19.6	16.7	14.5	16.2
	7	21.5	20.2	21	16.8	15.3	17.2	20.2	19.1	20.4	17.7	15.2	15.8
	9	21.8	20.8	21.6	16.8	15.6	18.1	20.3	19.8	21.1	18.2	15.9	17

## Sheet: Panel B to I
	Total IgG in serum			RSP specific IgG in serum			Total IgA in colon content			RSP specific IgA in colon content
	Non-Imm	Imm		Non-Imm	Imm		Non-Imm	Imm		Non-Imm	Imm
	4399.6	3756.2		0.015	1.393		0.22	0.3		0.149	0.633
	3924.1	4035.4		0.015	1.952		0.22	0.26		0.11	0.818
	4139.9	4279.4		0.014	1.372		0.26	0.26		0.196	0.195
	4338.4	3900.1		0.012	1.683		0.21	0.18		0.23	0.928
	4222.3	4495.9		0.013	1.124		0.2	0.13		0.135	0.812
	4187.5	4016.4		0.014	0.636		0.14	0.1		0.272	1.386
	Total IgA in jejunum content			RSP specific IgA in jejunum content			Total IgA in feces			RSP specific IgA in feces
	Non-Imm	Imm		Non-Imm	Imm		Non-Imm	Imm		Non-Imm	Imm
	0.036	0.047		0.114	1.104		0.072	0.094		0.174	0.296
	0.041	0.045		0.078	1.31		0.083	0.09		0.151	0.683
	0.025	0.046		0.06	0.563		0.216	0.091		0.172	0.191
	0.038	0.047		0.107	0.655		0.038	0.094		0.142	0.563
	0.014	0.046		0.078	0.663		0.076	0.092		0.107	0.88
	0.039	0.048		0.101	0.263		0.029	0.095		0.113	0.349
	0.013						0.027
							0.085
