# Supplementary material for: Targeting plasmid-encoded proteins that contain immunoglobulin-like domains to combat antimicrobial resistance
Source: eLife. 2024 Jul 24;13:RP95328. doi: 10.7554/eLife.95328 (PMC11268884; doi:10.7554/eLife.95328)
Supplement: Figure 3—source data 1. [file elife-95328-fig3-data1.xlsx]

## Sheet: Panel A
	dpi	Non-Imm Vehicle	Imm Vehicle	Non-Imm Salmonella	Imm Salmonella
	6	0
	6	0
	6	0
	6	0
	6	0
	6	0
	6	0
	6	0
	6	0
	6	0
	6	0
	6	0
	6		0
	6		0
	6		0
	6		0
	6		0
	6		0
	6		0
	6		0
	6		0
	6		0
	6		0
	6		0
	5			1
	2			1
	5			1
	4			1
	6			0
	6			0
	6			0
	6			0
	5			1
	5			1
	5			1
	5			1
	5				1
	5				1
	6				0
	6				0
	6				0
	6				0
	6				0
	6				0
	6				0
	6				0
	5				1
	4				1

## Sheet: Panel B & C
	Body weight change
	Non-Imm		Imm
	Vehicle	Salmonella	Vehicle	Salmonella
	0.44	-17.9	0.77	-24.6
	0.82	-20.3	1.76	-20.6
	2.9	-19.9	0.36	-24.3
	4.55	-21.8	1	-26.2
	5.77	-20.8	-2.5	-26.9
	1.9	-26.1	-4.8	-23.3
	0.2	-24.5	2.3	-23
	2.5	-28.9	4.23	-23.6
	1.2	-21.9	4.58	-20.2
	-0.9	-25.2	1	-22.6
		-22.6	1.5	-19.9
		-25.9	-2.3	-20.1
		-19.3
	Clinical signs
	Non-Imm		Imm
	Vehicle	Salmonella	Vehicle	Salmonella
	0	11	0	6
	0	7	0	7
	0	4	0	5
	0	11	0	6
	0	7	0	3
	0	8	0	4
	0	4	0	2
	0	8	0	4
	0	9	0	4
	0	6	0	5
	0	9	0	5
	0	9.5	0	5
	0	7	0	8
	0	10	0	6
