# Supplementary material for: Targeting plasmid-encoded proteins that contain immunoglobulin-like domains to combat antimicrobial resistance
Source: eLife. 2024 Jul 24;13:RP95328. doi: 10.7554/eLife.95328 (PMC11268884; doi:10.7554/eLife.95328)
Supplement: Figure 4—source data 1. [file elife-95328-fig4-data1.xlsx]

## Sheet: Panel A to F
	Total IgA in jejunum content					Total IgA in colon content					Total IgA in feces
	Non-Imm		Imm			Non-Imm		Imm			Non-Imm		Imm
	Vehicle	Salmonella	Vehicle	Salmonella		Vehicle	Salmonella	Vehicle	Salmonella		Vehicle	Salmonella	Vehicle	Salmonella
	0.063	0.078	0.058	0.08		0.114528	0.105008	0.188925	0.0900427		0.236289	0.126694	0.240295	0.260365
	0.046	0.064	0.062	0.095		0.120645	0.126411	0.113631	0.111177		0.25012	0.239675	0.259017	0.289211
	0.05	0.069	0.095	0.077		0.199491	0.0740621	0.0998055	0.173007		0.255351	0.239365	0.223466	0.244051
	0.053	0.074	0.076	0.089		0.154108	0.146825	0.25926	0.110067		0.281624	0.17914	0.19633	0.211511
	0.058	0.074	0.065	0.065		0.136574	0.074725	0.177382	0.089415		0.318395	0.178641	0.226392	0.23813
	0.059	0.048	0.057	0.066		0.074	0.065482	0.137038	0.246733		0.278299	0.227867	0.29912	0.295894
	0.079	0.047	0.104	0.079		0.075	0.068904	0.124656	0.152626		0.561997	0.275386	0.257344	0.339104
	0.061	0.064		0.08		0.062	0.080638	0.094474	0.124143		0.534234	0.244683	0.209697	0.253646
	0.071	0.053		0.099		0.071177	0.06708	0.075766	0.13686		0.564005	0.522514	0.107519	0.141058
	0.04	0.081				0.072652		0.106426	0.111406		0.443095	0.439487	0.1404	0.114823
	0.062	0.069				0.066062		0.114794	0.128702		0.443613	0.45725	0.172583
								0.091509	0.126371		0.518876	0.444649
	RSP specific IgA in jejunum content					RSP specific IgA in colon content					RSP specific IgA in feces
	Non-Imm		Imm			Non-Imm		Imm			Non-Imm		Imm
	Vehicle	Salmonella	Vehicle	Salmonella		Vehicle	Salmonella	Vehicle	Salmonella		Vehicle	Salmonella	Vehicle	Salmonella
	0.054	0.04	0.319	2.245		0.0975	0.243	0.2565	2.511		0.0975	0.0685	0.2565	2.511
	0.042	0.051	1.355	2.061		0.092	0.13	0.7605	1.7195		0.092	0.0575	0.7605	1.7195
	0.035	0.04	1.18	1.328		0.1135	0.0685	0.779	0.8425		0.1135	0.0855	0.779	0.8425
	0.042	0.071	1.005	1.652		0.1245	0.1385	0.1655	1.169		0.1245	0.064	0.1655	1.169
	0.037	0.057	1.214	0.284		0.102	0.0575	0.224	0.8265		0.102	0.0735	0.224	0.8265
	0.041	0.043	2.162	1.044		0.0695	0.0855	0.537	0.1635		0.0695	0.0605	0.537	1.4325
	0.0435	0.1985	0.8225	0.496		0.0745	0.064	0.552	0.251		0.048	0.0685	0.197	0.251
	0.0555	0.058	0.382	0.178		0.086	0.3195	0.446	0.747		0.0575	0.0765	0.1	0.2585
	0.0435	0.058	1.1175	1.662		0.1075	0.338	0.73	1.503		0.0665	0.076	0.2025	0.715
	0.0375	0.0725	0.5785	1.622		0.1	0.305	0.3155	0.0645		0.105	0.054	0.204	0.3585
	0.037	0.0955	1.2695	0.168		0.08	0.186	1.2265	0.423		0.0615	0.0685	0.1785	0.935
	0.03	0.1985	2.526	0.7095			0.403		0.523		0.0715	0.0615		0.339
														0.3195

## Sheet: Panel G to I
	Il-1β expression					Il-6 expression					Tnf-α expression
	Non-Imm		Imm			Non-Imm		Imm			Non-Imm		Imm
	Vehicle	Salmonella	Vehicle	Salmonella		Vehicle	Salmonella	Vehicle	Salmonella		Vehicle	Salmonella	Vehicle	Salmonella
	0.87	56.41	2.3	66.85		0.68	13.76	2.1	39.46		1.07	22.91	3.65	31.53
	0.87	67.31	1.18	50.49		1.11	37.72	2.51	23.96		1.01	26.05	3.64	23
	1.16	30.02	1.24	44.41		1.12	18.8	2.47	23.3		1.07	18.04	1.35	42.03
	1.09	12.23	1.03	36.2		1.2	29.29	1.06	36.06		1.04	11.86	0.99	19.54
	1.1	17.42	1.41	30.12		1.06	20.43	1.1	29.91		0.81	13.11	0.69	30.35
	0.91	24.9	0.93	16.43		0.83	24.12	0.65	41.24		0.54	12.71	1.631	24.82
	1.1	13.53	0.63	40.87		0.96	15.27	1.1	18.91		0.64	17.36	1.325	17.31
	1.06	20.86	0.32	49.11		1.25	4.95	1.26	12.3		1.219	13.006	0.667	29.47
	0.65	57	0.36	38.13		0.74	7.81	0.96	15.96		0.625	6.97	0.495	11.48
	0.8		0.46	23.64		1.18	19.24	0.62	15.68		1.241	7.24	0.284	11.2
	1.4			53.74		0.87		0.55			1.275	14.183	0.436	13.14
								1.28						11.84
