# Supplementary material for: Targeting plasmid-encoded proteins that contain immunoglobulin-like domains to combat antimicrobial resistance
Source: eLife. 2024 Jul 24;13:RP95328. doi: 10.7554/eLife.95328 (PMC11268884; doi:10.7554/eLife.95328)
Supplement: Figure 5—source data 1. [file elife-95328-fig5-data1.xlsx]

## Sheet: Panel A & B
	Total IgG in serum					RSP Specific IgG in serum
	Non-Imm		Imm			Non-Imm		Imm
	Vehicle	Salmonella	Vehicle	Salmonella		Vehicle	Salmonella	Vehicle	Salmonella
	27.2745	9.73458	25.7309	11.7676		0.018	0.016	0.354	1.268
	11.1462	8.8714	22.3745	18.4621		0.018	0.017	1.434	0.71
	16.8383	9.17838	26.4549	11.8157		0.016	0.024	0.377	0.816
	22.7411	7.64239	23.7974	12.6059		0.016	0.023	0.808	0.824
	33.496	13.3568	27.1686	13.439		0.018	0.016	1.8795	0.789
	42.37	13.2912	48.103	12.1048		0.016	0.03	0.958	0.878
	41.203	13.4226	48.296	26.224		0.052	0.026	1.955	0.537
	36.471	6.112	45.252	34.098		0.0515	0.0625	0.597	1.9585
	35.474	17.395	49.195	16.247		0.089	0.058	1.417	1.5685
	28.947	18.778	41.068	24.623		0.048	0.0815	1.0485	1.0445
	27.751	13.286	38.644	27.367		0.011	0.011	1.324	1.0785
	40.932	14.882	45.252	19.917		0.01	0.012	1.484	1.226
	35.629	11.427	43.0679	31.401		0.011	0.013	1.1875	1.059
		12.624		28.583		0.013		1.306	0.513

## Sheet: Panel C & D
	Spleen weight					Salmonella counts in spleen
	Non-Imm		Imm			Non-Imm		Imm
	Vehicle	Salmonella	Vehicle	Salmonella		Vehicle	Salmonella	Vehicle	Salmonella
	3.37	14.08	3.2	10.79		0	4.52055e+07	0	1.86047e+07
	3.09	12.34	3.4	8.24		0	1.8018e+06	0	1.64609e+07
	3.44	16.85	3.13	8.14		0	31316726	0	2483871
	2.93	12.91	2.87	6.3		0	125698324	0	3.71951e+06
	2.9	14.26	3.57	13.43		0	7.72727e+07	0	778688
	3.36	15.26	2.88	8.76		0	61752988	0	570175
	3.2	15.86	4.15	16.98		0	264423	1856.5	2.98913e+06
	4.1	16.1	4.29	9.52		920	1.51822e+07	1548.7	271429
	3.27	16.73	5.13	12.5		807.1	2.13576e+06	738.8	1.89189e+06
	4.76	10.29	4.33	14.06		724.1	1.1583e+06	1141.9	15400000
	4.45		5.11	11.51		0	1.6955e+06	460.8	2.25746e+06
			3.91	13.21		0		0	738.8
				8.19				0	683962
									253219

## Sheet: Panel G to I
	Il-1β expression					Il-6 expression					Tnf-α expression
	Non-Imm		Imm			Non-Imm		Imm			Non-Imm		Imm
	Vehicle	Salmonella	Vehicle	Salmonella		Vehicle	Salmonella	Vehicle	Salmonella		Vehicle	Salmonella	Vehicle	Salmonella
	0.87	9.07	0.61	4.52		1.02	35.08	1.53	34.48		1.07	2.66	1	5.27
	1.03	4.91	0.59	6.5		1.17	48.08	0.93	36.19		1.01	5.24	0.81	4.99
	1.07	11.21	0.46	3.53		0.98	47.75	1.52	66.83		0.97	8.81	1.02	4.84
	0.84	9.89	0.66	9.62		0.85	15.06	1.12	41.43		1	6.12	1	6.61
	1.05	9.2	0.64	7.04		1.05	21.67	0.93	44.55		1	6.7	1.12	4.54
	1.14	8.38	1.34	4.76		0.93	20.01	0.98	43.64		0.94	6.34	1.26	2.73
	1	14.63	0.86	6.09		0.94	38.31	0.83	29.5		0.92	7.51	1.42	3.43
	0.83	10.55	0.64	9.07		0.81	61.8	1.17	15.67		0.96	4.24	1.01	6.23
	0.93	15.83	1.36	9.48		1.08	33.12	1.44	25.1		0.89	3.98	0.7	2.64
	0.95	11.63	0.53			1.28	45.55	1.2	22.08		1.06	6.38	1.42	3.37
	1.08	16.5	1.49			0.83	30.37	0.96	29.03		1.05	3.98	0.82	2.37
	1.29		1.05			0.96					0.98		0.9	2.82
