# Supplementary material for: Targeting plasmid-encoded proteins that contain immunoglobulin-like domains to combat antimicrobial resistance
Source: eLife. 2024 Jul 24;13:RP95328. doi: 10.7554/eLife.95328 (PMC11268884; doi:10.7554/eLife.95328)
Supplement: Figure 8—source data 3. [file elife-95328-fig8-data3.xlsx]

## Sheet: Hoja1
Nb RSP	RSP 3 ugr/ml				BSA 3 ugr/ml
0.0013	0	0	0	0	0.106	0.009	0.022	0.183
0.006	0	0	0	0.061	0.132	0.007	0.014	0.084
0.032	0.23	0.431	0.247	0.263	0.024	0	0	0.084
0.16	0.8	0.986	0.811	0.679	0.009	0	0.05	0.084
0.8	0.705	0.98	0.933	0.821	0.101	0	0.008	0.053
4	0.93	0.7	0.95	0.89	0.052	0.009	0.031	0
20	0.887	1.007	0.944	0.901	0.047	0.004	0.008	0.115
