# Supplementary material for: Targeting plasmid-encoded proteins that contain immunoglobulin-like domains to combat antimicrobial resistance
Source: eLife. 2024 Jul 24;13:RP95328. doi: 10.7554/eLife.95328 (PMC11268884; doi:10.7554/eLife.95328)
Supplement: Figure 9—source data 1. [file elife-95328-fig9-data1.xlsx]

## Sheet: Hoja1
	ufc/ml
hours	R27 to ibpA::lacZ					R27 to ibpA::lacZ + E. coli DH10BT1R					R27 to ibpA::lacZ + E. coli DH10BT1R pNVFib1					R27 to ibpA::lacZ + E. coli DH10BT1R pNeae2 VHH anti RSP #3
24	13400	11000	700	150		5	10	410	100		140	65	5	590		0	50	75	0
36	187000	7600	120000	2100		35	940	33000	100		20	5	910	53000		5	2400	100	90
48	3200000	96000	360000	72000		670	6900	750000	850		1600	10	11500	1000000		8700	9700	800	5700
